# Supplementary material for: Self-Assembly of Silver Clusters into One- and Two-Dimensional Structures as Artificial Intelligent Sensors of Alcohol
Source: Research Square preprint supplement (doi:10.21203/rs.3.rs-964647/v1), 2021-11-03

## checkCIF/PLATON report

You have not supplied any structure factors. As a result the full set of tests cannot be run.

THIS REPORT IS FOR GUIDANCE ONLY. IF USED AS PART OF A REVIEW PROCEDURE FOR PUBLICATION, IT SHOULD NOT REPLACE THE EXPERTISE OF AN EXPERIENCED CRYSTALLOGRAPHIC REFEREE.

No syntax errors found.      CIF dictionary      Interpreting this report

### Datablock: Ag22-CBP

---

|                        |                         |                                 |
|------------------------|-------------------------|---------------------------------|
| Bond precision:        | C-C = 0.0138 A          | Wavelength=1.54184              |
| Cell:                  | a=31.2047(9)            | b=14.4204(5)      c=30.1096(13) |
|                        | alpha=90                | beta=101.376(4)      gamma=90   |
| Temperature:           | 100 K                   |                                 |
|                        | Calculated              | Reported                        |
| Volume                 | 13282.7(9)              | 13282.7(8)                      |
| Space group            | C 2/c                   | C 1 2/c 1                       |
| Hall group             | -C 2yc                  | -C 2yc                          |
| Moiety formula         | C55 H28 Ag11 F21 N4 O19 | C55 H28 Ag11 F21 N4 O19         |
| Sum formula            | C55 H28 Ag11 F21 N4 O19 | C55 H28 Ag11 F21 N4 O19         |
| Mr                     | 2634.39                 | 2634.38                         |
| Dx, g cm <sup>-3</sup> | 2.635                   | 2.635                           |
| Z                      | 8                       | 8                               |
| Mu (mm <sup>-1</sup> ) | 26.626                  | 26.627                          |
| F000                   | 9952.0                  | 9952.0                          |
| F000'                  | 9999.14                 |                                 |
| h, k, lmax             | 37, 17, 35              | 37, 17, 35                      |
| Nref                   | 11741                   | 9369                            |
| Tmin, Tmax             | 0.046, 0.264            | 0.290, 1.000                    |
| Tmin'                  | 0.007                   |                                 |

Correction method= # Reported T Limits: Tmin=0.290 Tmax=1.000  
AbsCorr = MULTI-SCAN

Data completeness= 0.798      Theta(max)= 66.592

|                               |                   |
|-------------------------------|-------------------|
| R(reflections)= 0.0487( 7046) | wR2(reflections)= |
| S = 1.010                     | 0.1238( 9369)     |
| Npar= 969                     |                   |

---

The following ALERTS were generated. Each ALERT has the format

**test-name\_ALERT\_alert-type\_alert-level.**

Click on the hyperlinks for more details of the test.

---

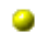

### Alert level C

ABSTY02\_ALERT\_1\_C An \_exptl\_absorpt\_correction\_type has been given without  
a literature citation. This should be contained in the  
\_exptl\_absorpt\_process\_details field.

Absorption correction given as multi-scan

|                   |                                    |                                           |              |
|-------------------|------------------------------------|-------------------------------------------|--------------|
| PLAT018_ALERT_1_C | _diffn_measured_fraction_theta_max | .NE. *_full                               | ! Check      |
| PLAT213_ALERT_2_C | Atom Ag1                           | has ADP max/min Ratio .....               | 3.2 prolat   |
| PLAT213_ALERT_2_C | Atom Ag2                           | has ADP max/min Ratio .....               | 3.7 prolat   |
| PLAT213_ALERT_2_C | Atom ClAA                          | has ADP max/min Ratio .....               | 3.6 prolat   |
| PLAT213_ALERT_2_C | Atom C25                           | has ADP max/min Ratio .....               | 3.5 prolat   |
| PLAT213_ALERT_2_C | Atom C95                           | has ADP max/min Ratio .....               | 3.1 prolat   |
| PLAT220_ALERT_2_C | NonSolvent                         | Resd 1 F Ueq(max)/Ueq(min) Range          | 3.5 Ratio    |
| PLAT220_ALERT_2_C | NonSolvent                         | Resd 1 O Ueq(max)/Ueq(min) Range          | 3.1 Ratio    |
| PLAT241_ALERT_2_C | High                               | 'MainMol' Ueq as Compared to Neighbors of | Ag1 Check    |
| PLAT241_ALERT_2_C | High                               | 'MainMol' Ueq as Compared to Neighbors of | O14 Check    |
| PLAT241_ALERT_2_C | High                               | 'MainMol' Ueq as Compared to Neighbors of | O18 Check    |
| PLAT242_ALERT_2_C | Low                                | 'MainMol' Ueq as Compared to Neighbors of | Ag3 Check    |
| PLAT242_ALERT_2_C | Low                                | 'MainMol' Ueq as Compared to Neighbors of | ClBA Check   |
| PLAT242_ALERT_2_C | Low                                | 'MainMol' Ueq as Compared to Neighbors of | C9 Check     |
| PLAT242_ALERT_2_C | Low                                | 'MainMol' Ueq as Compared to Neighbors of | C20 Check    |
| PLAT242_ALERT_2_C | Low                                | 'MainMol' Ueq as Compared to Neighbors of | C31 Check    |
| PLAT242_ALERT_2_C | Low                                | 'MainMol' Ueq as Compared to Neighbors of | C51 Check    |
| PLAT342_ALERT_3_C | Low Bond Precision on              | C-C Bonds .....                           | 0.01379 Ang. |
| PLAT362_ALERT_2_C | Short                              | C(sp3)-C(sp2) Bond C51 - C52              | 1.41 Ang.    |

---

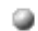

### Alert level G

|                   |                                                  |                                           |             |
|-------------------|--------------------------------------------------|-------------------------------------------|-------------|
| PLAT002_ALERT_2_G | Number of Distance or Angle Restraints on AtSite | 4 Note                                    |             |
| PLAT004_ALERT_5_G | Polymeric Structure Found with Maximum Dimension | 3 Info                                    |             |
| PLAT012_ALERT_1_G | N.O.K. _shelx_res_checksum Found in CIF .....    | Please Check                              |             |
| PLAT171_ALERT_4_G | The CIF-Embedded .res File Contains EADP Records | 2 Report                                  |             |
| PLAT172_ALERT_4_G | The CIF-Embedded .res File Contains DFIX Records | 1 Report                                  |             |
| PLAT173_ALERT_4_G | The CIF-Embedded .res File Contains DANG Records | 2 Report                                  |             |
| PLAT242_ALERT_2_G | Low                                              | 'MainMol' Ueq as Compared to Neighbors of | ClAA Check  |
| PLAT242_ALERT_2_G | Low                                              | 'MainMol' Ueq as Compared to Neighbors of | C24 Check   |
| PLAT242_ALERT_2_G | Low                                              | 'MainMol' Ueq as Compared to Neighbors of | C26 Check   |
| PLAT242_ALERT_2_G | Low                                              | 'MainMol' Ueq as Compared to Neighbors of | C28 Check   |
| PLAT242_ALERT_2_G | Low                                              | 'MainMol' Ueq as Compared to Neighbors of | C30 Check   |
| PLAT242_ALERT_2_G | Low                                              | 'MainMol' Ueq as Compared to Neighbors of | C52 Check   |
| PLAT242_ALERT_2_G | Low                                              | 'MainMol' Ueq as Compared to Neighbors of | C67 Check   |
| PLAT301_ALERT_3_G | Main Residue Disorder .....                      | (Resd 1 )                                 | 1% Note     |
| PLAT343_ALERT_2_G | Unusual sp?                                      | Angle Range in Main Residue for           | C20 Check   |
| PLAT343_ALERT_2_G | Unusual sp?                                      | Angle Range in Main Residue for           | C40 Check   |
| PLAT343_ALERT_2_G | Unusual                                          | Angle Range in Main Residue for           | C49 Check   |
| PLAT343_ALERT_2_G | Unusual                                          | Angle Range in Main Residue for           | C50 Check   |
| PLAT720_ALERT_4_G | Number of Unusual/Non-Standard Labels .....      |                                           | 3 Note      |
| PLAT779_ALERT_4_G | Suspect or Irrelevant (Bond) Angle(s) in CIF ... |                                           | 17.80 Deg.  |
|                   | AG2 -N2 -AG2A                                    | 3_545 1_555 3_545 .....                   | # 391 Check |
| PLAT860_ALERT_3_G | Number of Least-Squares Restraints .....         |                                           | 3 Note      |
| PLAT933_ALERT_2_G | Number of OMIT Records in Embedded .res File ... |                                           | 2067 Note   |
| PLAT941_ALERT_3_G | Average HKL Measurement Multiplicity .....       |                                           | 3.1 Low     |

---

```

0 ALERT level A = Most likely a serious problem - resolve or explain
0 ALERT level B = A potentially serious problem, consider carefully
20 ALERT level C = Check. Ensure it is not caused by an omission or oversight
23 ALERT level G = General information/check it is not something unexpected

3 ALERT type 1 CIF construction/syntax error, inconsistent or missing data
30 ALERT type 2 Indicator that the structure model may be wrong or deficient
4 ALERT type 3 Indicator that the structure quality may be low
5 ALERT type 4 Improvement, methodology, query or suggestion
1 ALERT type 5 Informative message, check

```

---

## Validation response form

Please find below a validation response form (VRF) that can be filled in and pasted into your CIF.

```

# start Validation Reply Form
_vrf_ABSTY02_Ag22-CBP
;
PROBLEM: An _exptl_absorpt_correction_type has been given without
RESPONSE: ...
;
_vrf_PLAT018_Ag22-CBP
;
PROBLEM: _diffrn_measured_fraction_theta_max .NE. *_full ! Check
RESPONSE: ...
;
_vrf_PLAT213_Ag22-CBP
;
PROBLEM: Atom Ag1 has ADP max/min Ratio ..... 3.2 prolat
RESPONSE: ...
;
_vrf_PLAT220_Ag22-CBP
;
PROBLEM: NonSolvent Resd 1 F Ueq(max)/Ueq(min) Range 3.5 Ratio
RESPONSE: ...
;
_vrf_PLAT241_Ag22-CBP
;
PROBLEM: High 'MainMol' Ueq as Compared to Neighbors of Ag1 Check
RESPONSE: ...
;
_vrf_PLAT242_Ag22-CBP
;
PROBLEM: Low 'MainMol' Ueq as Compared to Neighbors of Ag3 Check
RESPONSE: ...
;
_vrf_PLAT342_Ag22-CBP
;
PROBLEM: Low Bond Precision on C-C Bonds ..... 0.01379 Ang.
RESPONSE: ...
;
_vrf_PLAT362_Ag22-CBP
;

```

PROBLEM: Short C(sp3)-C(sp2) Bond C51 - C52 . 1.41 Ang.  
RESPONSE: ...  
;  
# end Validation Reply Form

---

It is advisable to attempt to resolve as many as possible of the alerts in all categories. Often the minor alerts point to easily fixed oversights, errors and omissions in your CIF or refinement strategy, so attention to these fine details can be worthwhile. In order to resolve some of the more serious problems it may be necessary to carry out additional measurements or structure refinements. However, the purpose of your study may justify the reported deviations and the more serious of these should normally be commented upon in the discussion or experimental section of a paper or in the "special\_details" fields of the CIF. checkCIF was carefully designed to identify outliers and unusual parameters, but every test has its limitations and alerts that are not important in a particular case may appear. Conversely, the absence of alerts does not guarantee there are no aspects of the results needing attention. It is up to the individual to critically assess their own results and, if necessary, seek expert advice.

#### **Publication of your CIF in IUCr journals**

A basic structural check has been run on your CIF. These basic checks will be run on all CIFs submitted for publication in IUCr journals (*Acta Crystallographica*, *Journal of Applied Crystallography*, *Journal of Synchrotron Radiation*); however, if you intend to submit to *Acta Crystallographica Section C* or *E* or *IUCrData*, you should make sure that full publication checks are run on the final version of your CIF prior to submission.

#### **Publication of your CIF in other journals**

Please refer to the *Notes for Authors* of the relevant journal for any special instructions relating to CIF submission.

---

**PLATON version of 13/07/2021; check.def file version of 13/07/2021**

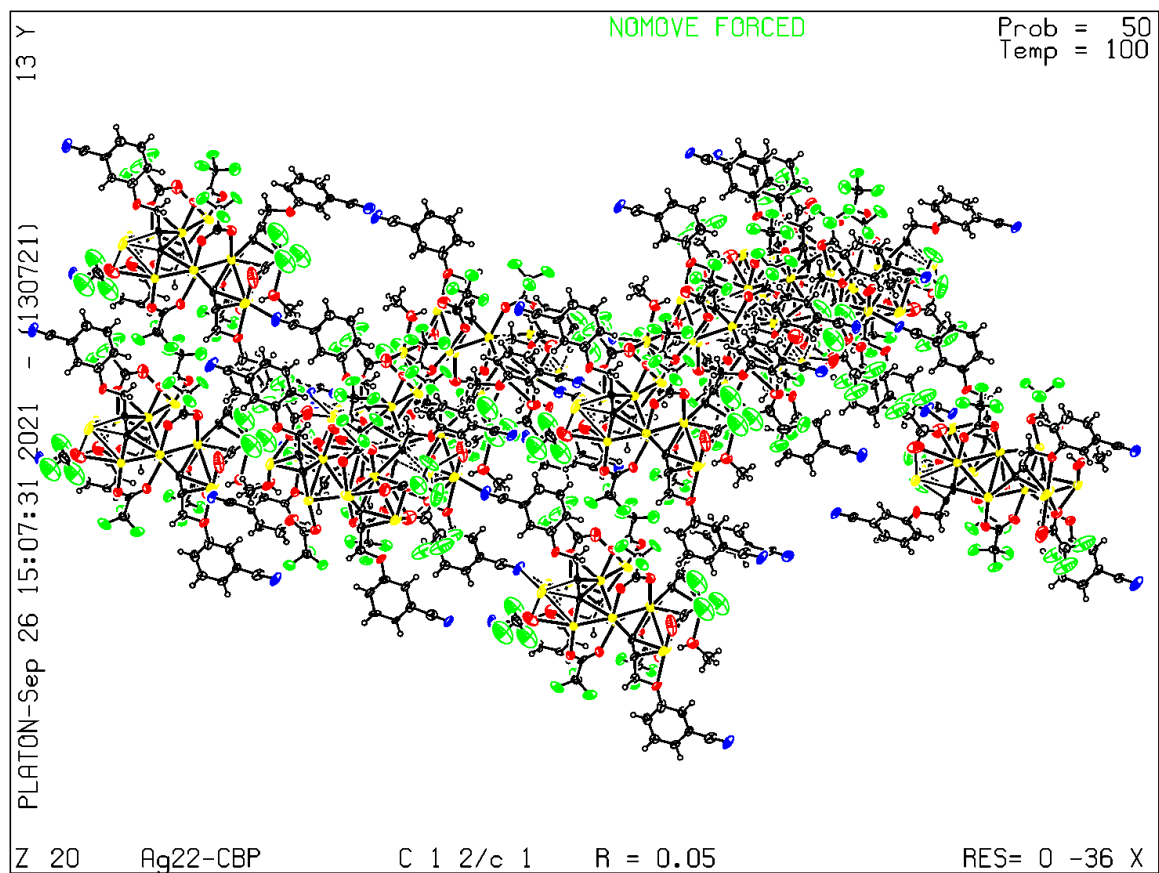

Supplement: Supplementary file 1 [file 4edc0f90e909cc2793b3d2cb.pdf]
