# Supplementary material for: Self-Assembly of Silver Clusters into One- and Two-Dimensional Structures as Artificial Intelligent Sensors of Alcohol
Source: Research Square preprint supplement (doi:10.21203/rs.3.rs-964647/v1), 2021-11-03
Supplement: Supplementary file 2 [file a1c0faeafd58e4380ded063c.pdf]

## checkCIF/PLATON report

You have not supplied any structure factors. As a result the full set of tests cannot be run.

THIS REPORT IS FOR GUIDANCE ONLY. IF USED AS PART OF A REVIEW PROCEDURE FOR PUBLICATION, IT SHOULD NOT REPLACE THE EXPERTISE OF AN EXPERIENCED CRYSTALLOGRAPHIC REFEREE.

No syntax errors found.      CIF dictionary      Interpreting this report

### Datablock: Ag16-CBP

---

Bond precision:      C-C = 0.0259 Å      Wavelength=1.54184

Cell:                      a=12.5661 (6)                      b=15.2008 (6)                      c=17.6631 (7)  
                              alpha=84.290 (3)                      beta=83.029 (4)                      gamma=67.249 (4)  
Temperature:              293 K

|                        | Calculated                        | Reported                                                |
|------------------------|-----------------------------------|---------------------------------------------------------|
| Volume                 | 3083.3 (2)                        | 3083.3 (2)                                              |
| Space group            | P -1                              | P -1                                                    |
| Hall group             | -P 1                              | -P 1                                                    |
| Moiety formula         | C27 H15 Ag8 F27 N O21 S, C6 H16 N | C27 H13 Ag8 F25.284 N O20 S, H2 O, C6 H16 N, 1.716 (F1) |
| Sum formula            | C33 H31 Ag8 F27 N2 O21 S          | C33 H31 Ag8 F27 N2 O21 S                                |
| Mr                     | 2199.62                           | 2199.62                                                 |
| Dx, g cm <sup>-3</sup> | 2.369                             | 2.369                                                   |
| Z                      | 2                                 | 2                                                       |
| Mu (mm <sup>-1</sup> ) | 21.648                            | 21.648                                                  |
| F000                   | 2092.0                            | 2092.0                                                  |
| F000'                  | 2103.23                           |                                                         |
| h, k, lmax             | 15, 18, 21                        | 14, 17, 21                                              |
| Nref                   | 11040                             | 10641                                                   |
| Tmin, Tmax             | 0.097, 0.339                      | 0.033, 1.000                                            |
| Tmin'                  | 0.016                             |                                                         |

Correction method= # Reported T Limits: Tmin=0.033 Tmax=1.000

AbsCorr = MULTI-SCAN

Data completeness= 0.964

Theta(max)= 67.142

R(reflections)= 0.0788( 7650)

wR2(reflections)=  
0.2395( 10641)

S = 1.034

Npar= 649

The following ALERTS were generated. Each ALERT has the format

**test-name\_ALERT\_alert-type\_alert-level.**

Click on the hyperlinks for more details of the test.

---

 **Alert level A**

PLAT201\_ALERT\_2\_A Isotropic non-H Atoms in Main Residue(s) ..... 26 Report  
F1 F2 F3 F4 F5 etc.

RESPONSE: F atoms are highly disordered and ANIS was not applied on F atoms.

---

 **Alert level B**

PLAT342\_ALERT\_3\_B Low Bond Precision on C-C Bonds ..... 0.02588 Ang.

---

 **Alert level C**

PLAT029\_ALERT\_3\_C \_diffn\_measured\_fraction\_theta\_full value Low . 0.964 Why?  
PLAT220\_ALERT\_2\_C NonSolvent Resd 1 F Ueq(max)/Ueq(min) Range 5.8 Ratio  
PLAT241\_ALERT\_2\_C High 'MainMol' Ueq as Compared to Neighbors of 06 Check  
PLAT241\_ALERT\_2\_C High 'MainMol' Ueq as Compared to Neighbors of 013 Check  
PLAT241\_ALERT\_2\_C High 'MainMol' Ueq as Compared to Neighbors of C1 Check  
PLAT241\_ALERT\_2\_C High 'MainMol' Ueq as Compared to Neighbors of C3 Check  
PLAT241\_ALERT\_2\_C High 'MainMol' Ueq as Compared to Neighbors of C9 Check  
PLAT241\_ALERT\_2\_C High 'MainMol' Ueq as Compared to Neighbors of C20 Check  
PLAT242\_ALERT\_2\_C Low 'MainMol' Ueq as Compared to Neighbors of S9 Check  
PLAT242\_ALERT\_2\_C Low 'MainMol' Ueq as Compared to Neighbors of 03 Check  
PLAT242\_ALERT\_2\_C Low 'MainMol' Ueq as Compared to Neighbors of 04 Check  
PLAT242\_ALERT\_2\_C Low 'MainMol' Ueq as Compared to Neighbors of N3AA Check  
PLAT242\_ALERT\_2\_C Low 'MainMol' Ueq as Compared to Neighbors of C17 Check  
PLAT242\_ALERT\_2\_C Low 'MainMol' Ueq as Compared to Neighbors of C19 Check  
PLAT243\_ALERT\_4\_C High 'Solvent' Ueq as Compared to Neighbors of C27 Check  
PLAT243\_ALERT\_4\_C High 'Solvent' Ueq as Compared to Neighbors of C29 Check  
PLAT244\_ALERT\_4\_C Low 'Solvent' Ueq as Compared to Neighbors of N1 Check  
PLAT244\_ALERT\_4\_C Low 'Solvent' Ueq as Compared to Neighbors of C32 Check  
PLAT260\_ALERT\_2\_C Large Average Ueq of Residue Including N1 0.119 Check  
PLAT314\_ALERT\_2\_C Small Angle for H2O: Metal-O20 -H20A . 78.86 Degree  
PLAT412\_ALERT\_2\_C Short Intra XH3 .. XHn H28C ..H29A . 1.80 Ang.  
x,y,z = 1\_555 Check

---

 **Alert level G**

PLAT002\_ALERT\_2\_G Number of Distance or Angle Restraints on AtSite 41 Note  
PLAT004\_ALERT\_5\_G Polymeric Structure Found with Maximum Dimension 2 Info  
PLAT007\_ALERT\_5\_G Number of Unrefined Donor-H Atoms ..... 6 Report  
PLAT012\_ALERT\_1\_G N.O.K. \_shelx\_res\_checksum Found in CIF ..... Please Check  
PLAT042\_ALERT\_1\_G Calc. and Reported Moiety Formula Strings Differ Please Check  
PLAT072\_ALERT\_2\_G SHELXL First Parameter in WGHT Unusually Large 0.15 Report  
PLAT083\_ALERT\_2\_G SHELXL Second Parameter in WGHT Unusually Large 8.94 Why ?  
PLAT171\_ALERT\_4\_G The CIF-Embedded .res File Contains EADP Records 13 Report  
PLAT172\_ALERT\_4\_G The CIF-Embedded .res File Contains DFIX Records 8 Report  
PLAT173\_ALERT\_4\_G The CIF-Embedded .res File Contains DANG Records 9 Report

|                   |                                                  |       |        |
|-------------------|--------------------------------------------------|-------|--------|
| PLAT176_ALERT_4_G | The CIF-Embedded .res File Contains SADI Records | 6     | Report |
| PLAT199_ALERT_1_G | Reported _cell_measurement_temperature ..... (K) | 293   | Check  |
| PLAT200_ALERT_1_G | Reported _diffn_ambient_temperature ..... (K)    | 293   | Check  |
| PLAT242_ALERT_2_G | Low 'MainMol' Ueq as Compared to Neighbors of    | C2    | Check  |
| PLAT242_ALERT_2_G | Low 'MainMol' Ueq as Compared to Neighbors of    | C6    | Check  |
| PLAT242_ALERT_2_G | Low 'MainMol' Ueq as Compared to Neighbors of    | C8    | Check  |
| PLAT242_ALERT_2_G | Low 'MainMol' Ueq as Compared to Neighbors of    | C10   | Check  |
| PLAT242_ALERT_2_G | Low 'MainMol' Ueq as Compared to Neighbors of    | C12   | Check  |
| PLAT242_ALERT_2_G | Low 'MainMol' Ueq as Compared to Neighbors of    | C14   | Check  |
| PLAT242_ALERT_2_G | Low 'MainMol' Ueq as Compared to Neighbors of    | C16   | Check  |
| PLAT242_ALERT_2_G | Low 'MainMol' Ueq as Compared to Neighbors of    | C18   | Check  |
| PLAT300_ALERT_4_G | Atom Site Occupancy of F1AA Constrained at       | 0.5   | Check  |
| PLAT300_ALERT_4_G | Atom Site Occupancy of F21A Constrained at       | 0.5   | Check  |
| PLAT301_ALERT_3_G | Main Residue Disorder .....(Resd 1 )             | 12%   | Note   |
| PLAT302_ALERT_4_G | Anion/Solvent/Minor-Residue Disorder (Resd 2 )   | 14%   | Note   |
| PLAT343_ALERT_2_G | Unusual sp3 Angle Range in Main Residue for      | C8    | Check  |
| PLAT367_ALERT_2_G | Long? C(sp?)-C(sp?) Bond C17 - C18 .             | 1.52  | Ang.   |
| PLAT410_ALERT_2_G | Short Intra H...H Contact H27B ..H31B .          | 1.62  | Ang.   |
|                   | x,y,z =                                          | 1_555 | Check  |
| PLAT410_ALERT_2_G | Short Intra H...H Contact H29B ..H31D .          | 1.56  | Ang.   |
|                   | x,y,z =                                          | 1_555 | Check  |
| PLAT412_ALERT_2_G | Short Intra XH3 .. XHn H31C ..H32C .             | 1.99  | Ang.   |
|                   | x,y,z =                                          | 1_555 | Check  |
| PLAT412_ALERT_2_G | Short Intra XH3 .. XHn H31D ..H32B .             | 1.99  | Ang.   |
|                   | x,y,z =                                          | 1_555 | Check  |
| PLAT412_ALERT_2_G | Short Intra XH3 .. XHn H32A ..H31B .             | 2.06  | Ang.   |
|                   | x,y,z =                                          | 1_555 | Check  |
| PLAT412_ALERT_2_G | Short Intra XH3 .. XHn H32C ..H31A .             | 1.81  | Ang.   |
|                   | x,y,z =                                          | 1_555 | Check  |
| PLAT412_ALERT_2_G | Short Intra XH3 .. XHn H32C ..H31B .             | 1.63  | Ang.   |
|                   | x,y,z =                                          | 1_555 | Check  |
| PLAT414_ALERT_2_G | Short Intra D-H..H-X H1B ..H27A                  | 2.10  | Ang.   |
|                   | x,y,z =                                          | 1_555 | Check  |
| PLAT414_ALERT_2_G | Short Intra D-H..H-X H1B ..H30A                  | 1.96  | Ang.   |
|                   | x,y,z =                                          | 1_555 | Check  |
| PLAT414_ALERT_2_G | Short Intra D-H..H-X H30A ..H1A                  | 2.05  | Ang.   |
|                   | x,y,z =                                          | 1_555 | Check  |
| PLAT414_ALERT_2_G | Short Intra D-H..H-X H32A ..H1A                  | 2.13  | Ang.   |
|                   | x,y,z =                                          | 1_555 | Check  |
| PLAT720_ALERT_4_G | Number of Unusual/Non-Standard Labels .....      | 8     | Note   |
| PLAT860_ALERT_3_G | Number of Least-Squares Restraints .....         | 76    | Note   |
| PLAT933_ALERT_2_G | Number of OMIT Records in Embedded .res File ... | 300   | Note   |
| PLAT941_ALERT_3_G | Average HKL Measurement Multiplicity .....       | 3.9   | Low    |

- 
- 1 **ALERT level A** = Most likely a serious problem - resolve or explain  
 1 **ALERT level B** = A potentially serious problem, consider carefully  
 21 **ALERT level C** = Check. Ensure it is not caused by an omission or oversight  
 42 **ALERT level G** = General information/check it is not something unexpected
- 4 ALERT type 1 CIF construction/syntax error, inconsistent or missing data  
 42 ALERT type 2 Indicator that the structure model may be wrong or deficient  
 5 ALERT type 3 Indicator that the structure quality may be low  
 12 ALERT type 4 Improvement, methodology, query or suggestion  
 2 ALERT type 5 Informative message, check
-

It is advisable to attempt to resolve as many as possible of the alerts in all categories. Often the minor alerts point to easily fixed oversights, errors and omissions in your CIF or refinement strategy, so attention to these fine details can be worthwhile. In order to resolve some of the more serious problems it may be necessary to carry out additional measurements or structure refinements. However, the purpose of your study may justify the reported deviations and the more serious of these should normally be commented upon in the discussion or experimental section of a paper or in the "special\_details" fields of the CIF. checkCIF was carefully designed to identify outliers and unusual parameters, but every test has its limitations and alerts that are not important in a particular case may appear. Conversely, the absence of alerts does not guarantee there are no aspects of the results needing attention. It is up to the individual to critically assess their own results and, if necessary, seek expert advice.

### Publication of your CIF in IUCr journals

A basic structural check has been run on your CIF. These basic checks will be run on all CIFs submitted for publication in IUCr journals (*Acta Crystallographica*, *Journal of Applied Crystallography*, *Journal of Synchrotron Radiation*); however, if you intend to submit to *Acta Crystallographica Section C* or *E* or *IUCrData*, you should make sure that full publication checks are run on the final version of your CIF prior to submission.

### Publication of your CIF in other journals

Please refer to the *Notes for Authors* of the relevant journal for any special instructions relating to CIF submission.

### Validation response form

Please find below a validation response form (VRF) that can be filled in and pasted into your CIF.

```
# start Validation Reply Form
_vrf_PLAT201_Ag16-CBP
;
PROBLEM: Isotropic non-H Atoms in Main Residue(s) ..... 26 Report
RESPONSE: F atoms are highly disordered and ANIS was not applied on F atoms.
;
_vrf_PLAT029_Ag16-CBP
;
PROBLEM: _diffrn_measured_fraction_theta_full value Low . RESPONSE: 64. Why?
;
_vrf_PLAT220_Ag16-CBP
;
PROBLEM: NonSolvent Resd 1 F Ueq(max)/Ueq(min) Range RESPONSE: ...
;
_vrf_PLAT241_Ag16-CBP
;
PROBLEM: High 'MainMol' Ueq as Compared to Neighbors of RESPONSE: ...
;
_vrf_PLAT242_Ag16-CBP 06 Check
```

```

;
PROBLEM: Low      'MainMol' Ueq as Compared to Neighbors of      S9 Check
RESPONSE: ...
;
_vrf_PLAT243_Ag16-CBP
;
PROBLEM: High     'Solvent' Ueq as Compared to Neighbors of      C27 Check
RESPONSE: ...
;
_vrf_PLAT244_Ag16-CBP
;
PROBLEM: Low      'Solvent' Ueq as Compared to Neighbors of      N1 Check
RESPONSE: ...
;
_vrf_PLAT260_Ag16-CBP
;
PROBLEM: Large Average Ueq of Residue Including      N1      0.119 Check
RESPONSE: ...
;
_vrf_PLAT314_Ag16-CBP
;
PROBLEM: Small Angle for H2O: Metal-O2O      -H20A      .      78.86 Degree
RESPONSE: ...
;
_vrf_PLAT412_Ag16-CBP
;
PROBLEM: Short Intra XH3 .. XHn      H28C      ..H29A      .      1.80 Ang.
RESPONSE: ...
;
# end Validation Reply Form

```

---

**PLATON version of 13/07/2021; check.def file version of 13/07/2021**
